# Supplementary material for: Influencia de la superficie de juego en el rendimiento de futbolistas amateurs: hierba natural, césped artificial y tierra
Source: MDPI journal article supplement (doi:10.3390/jpm11060459), 2012-01-01
Supplement: s1 [file s1]

**Table S1. Annex 1: Data Collection Sheet**

|                                          |              |                        |                    |          |             |          |               |                 |           |       |
|------------------------------------------|--------------|------------------------|--------------------|----------|-------------|----------|---------------|-----------------|-----------|-------|
| <b>Patient identification</b>            | Initials     |                        |                    |          |             |          |               |                 |           |       |
| <b>Data of enrolment in the study</b>    | dd-mm-yy     |                        |                    |          |             |          |               |                 |           |       |
| <b>Age</b>                               | Years of age |                        |                    |          |             |          |               |                 |           |       |
| <b>Sex</b>                               | Male         | Female                 |                    |          |             |          |               |                 |           |       |
| <b>Contact with any COVID-19 patient</b> | No           | Yes                    |                    |          |             |          |               |                 |           |       |
| <b>Chronic diseases</b>                  |              |                        |                    |          |             |          |               |                 |           |       |
| <b>COVID-19 related symptoms</b>         | No           | Yes                    |                    |          |             |          |               |                 |           |       |
| <b>Data onset symptoms</b>               | dd-mm        |                        |                    |          |             |          |               |                 |           |       |
| <b>Sort of symptoms</b>                  | Fever        | Cough                  | Fatigue            | Dyspnoea | Odynophagia | Headache | Arthromyalgia | Anosmia-Ageusia | Diarrhoea | Other |
| <b>48 hours evolution</b>                | Healed       | Clinical deterioration | Hospital admission | Deceased |             |          |               |                 |           |       |
| <b>48 hours symptoms</b>                 | Fever        | Cough                  | Fatigue            | Dyspnoea | Odynophagia | Headache | Arthromyalgia | Anosmia-Ageusia | Diarrhoea | Other |
| <b>4 days evolution</b>                  | Healed       | Clinical deterioration | Hospital admission | Deceased |             |          |               |                 |           |       |
| <b>4 days symptoms</b>                   | Fever        | Cough                  | Fatigue            | Dyspnoea | Odynophagia | Headache | Arthromyalgia | Anosmia-Ageusia | Diarrhoea | Other |

|                                        |               |                        |                    |          |             |          |               |                 |           |       |
|----------------------------------------|---------------|------------------------|--------------------|----------|-------------|----------|---------------|-----------------|-----------|-------|
| <b>7 days evolution</b>                | Healed        | Clinical deterioration | Hospital admission | Deceased |             |          |               |                 |           |       |
| <b>7 days symptoms</b>                 | Fever         | Cough                  | Fatigue            | Dyspnoea | Odynophagia | Headache | Arthromyalgia | Anosmia-Ageusia | Diarrhoea | Other |
| <b>10 days evolution</b>               | Healed        | Clinical deterioration | Hospital admission | Deceased |             |          |               |                 |           |       |
| <b>10 days symptoms</b>                | Fever         | Cough                  | Fatigue            | Dyspnoea | Odynophagia | Headache | Arthromyalgia | Anosmia-Ageusia | Diarrhoea | Other |
| <b>14 days evolution</b>               | Healed        | Clinical deterioration | Hospital admission | Deceased |             |          |               |                 |           |       |
| <b>14 days symptoms</b>                | Fever         | Cough                  | Fatigue            | Dyspnoea | Odynophagia | Headache | Arthromyalgia | Anosmia-Ageusia | Diarrhoea | Other |
| <b>Date of Hospital admission</b>      | dd-mm         |                        |                    |          |             |          |               |                 |           |       |
| <b>Type of admission</b>               | Hospital unit | ICU                    |                    |          |             |          |               |                 |           |       |
| <b>Loss during monitoring. Causes.</b> |               |                        |                    |          |             |          |               |                 |           |       |
