# Supplementary figures and images for: Influencia de la superficie de juego en el rendimiento de futbolistas amateurs: hierba natural, césped artificial y tierra
Source: MDPI journal article supplement (doi:10.3390/jpm11060459), 2012-01-01

## Participants' flowchart

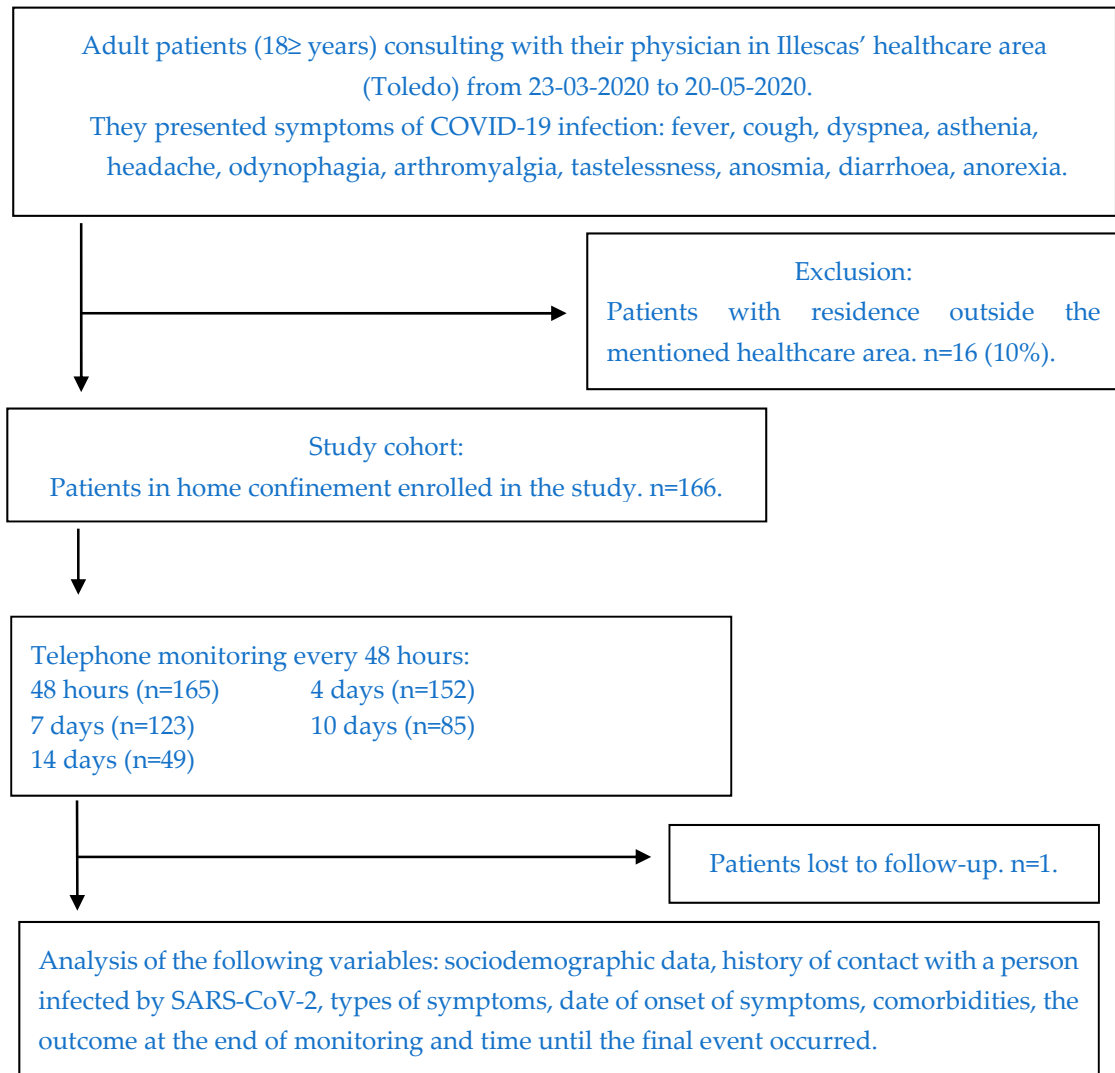

Supplement: s1 [file s1]
